# Supplementary material for: The impact of traumatic exposure among Faroese women during pregnancy and after childbirth
Source: Research Square preprint supplement (doi:10.21203/rs.3.rs-7784621/v1), 2025-11-24
Supplement: Supplementary file 1 [file 50bcfa22c6d6808d3f3f67e2.docx]

**Midwifery Service – Special Team for Postnatal Depression**

________________________________________________________________________

# Questionnaire – Childbirth and Family Well-being

________________________________________________________________________

1.

**Mother’s date of birth**

**Gestational week**

**Due date**

**Postal code**

**2. Country of birth**
___ The Faroe Islands
___ Other – where: ____________________

**3. How long have you lived in the Faroe Islands?**
___ Less than ½ year
___ 1 year
___ 2–3 years
___ More than 3 years

**4. How would you describe your overall health?**

*Please check the box that best describes your situation*
___ Very good
___ Good
___ Fair
___ Poor
___ Very poor

**5. Do you think you can do something yourself to maintain good health?
I find that my own effort is:**
*Please check the box that best describes your situation*
___ Very important
___ Important
___ Somewhat important
___ Not important
___ Not at all important

**6. How would you rate your physical health?**
*Please check the box that best describes your situation*
___ Very good
___ Good
___ Fair
___ Poor
___ Very poor

**7. Would you like to be more physically active?**
*Please check the box that best describes your situation*
___ Yes
___ No
___ Don’t know

**8. How comfortable do you feel in your body?**
___ Very good
___ Good
___ Fair
___ Poor
___ Very poor

**9. How would you rate your body awareness (your ability to listen to your body)?**
*Please check the box that best describes your situation*___ Very good
___ Good
___ Fair
___ Not very good
___ Very poor

**Sleep**

**11. Do you feel you get enough sleep to feel rested?**
*Please check the box that best describes your situation*
___ Yes, usually – go to question 13
___ Yes, but not often enough
___ No, never or almost never

**12. What are the reasons you do not get enough sleep?**
*Please check the box that best describes your situation*
___ Noise from others in the home (e.g., snoring, TV)
___ Noise from outside (e.g., traffic, neighbors)
___ Toilet visits
___ Children
___ Worry
___ Other – what: __________________

**Becoming a parent**

**13. Number of children**
*Please check the box that best describes your situation*
___ I have given birth before
___ This is my first child – go to question 20
___ I have adopted – go to question 20
___ Other – what? __________________ go to question 20

**14. How many children live in your home?**
*Please check the box that best describes your situation*
___ One
___ Two
___ Three
___ Four or more

**15. How did you give birth last time?**
*Please check the box that best describes your situation*
___ Vaginal birth
___ Cesarean section

**16. Were there complications in your last pregnancy?**
*Please check the box that best describes your situation*
___ No
___ Yes – Which? __________________

**17. How was your physical well-being during your last pregnancy?***Please check the box that best describes your situation*
___ Very good
___ Good
___ Fair
___ Poor
___ Very poor

**18. How was your psychological well-being during your last pregnancy?**
*Please check the box that best describes your situation*
___ Very good
___ Good
___ Fair
___ Poor
___ Very poor

**19. Were there complications during your last childbirth?**
*Please check the box that best describes your situation*
___ No
___ Yes

**If there were, were the complications:**
___ Physical – Which? __________________
___ Psychological – Which? __________________

**20. What thoughts and expectations do you have about your upcoming childbirth?**
*Please check the box that best describes your situation*
___ I am looking forward to giving birth
___ I am looking forward but also worried about coping
___ I am very worried about coping
___ I am very worried and afraid to give birth

**21. How much confidence do you have in yourself and your body as an expectant mother?**
*Please check the box that best describes your situation*
___ Very good
___ Good
___ Fair
___ Poor
___ Very poor

**22. Are you looking forward to becoming a mother?**
*Please check the box that best describes your situation*
___ Very much
___ Yes
___ Somewhat
___ Not at all

**23. How do you imagine yourself as a mother?***Please check the box that best describes your situation*
___ I imagine I will be a good mother
___ I look forward to becoming a mother, but I’m worried if I can handle it
___ I can’t imagine being a good mother

**24. Do you plan to breastfeed?**
*Please check the box that best describes your situation*
___ Yes
___ No
___ Don’t know

**25. Have you breastfed before?**
*Please check the box that best describes your situation*
___ Yes
___ No – go to question 27

**26. How did breastfeeding go?**
*Please check the box that best describes your situation*
___ Very good
___ Good
___ Fair
___ Poor
___ Very poor

**Network and Contact**

**27. How often are you in contact with family, friends, or acquaintances that you don’t live with? (Including meeting, talking, writing, etc.)**

*Please check the boxes that best describe your situation*

|  | Every day | Often | Sometimes | Rarely | Never |
| --- | --- | --- | --- | --- | --- |
| **Family you don’t live with** |  |  |  |  |  |
| **Friends and acquaintances** |  |  |  |  |  |
| **Colleagues, classmates, or fellow students in your free time** |  |  |  |  |  |
| **Neighbors** |  |  |  |  |  |
| **People you are in contact with through e-mail, chat, or similar platforms** |  |  |  |  |  |

**28. Do you have someone to talk to if you have personal problems or need support?***Please check the box that best describes your situation*
___ Always
___ Most of the time
___ Usually not
___ Never

**Self-care**

**29. Overall, how do you feel you are doing?**
*Please check the box that best describes your situation*
___ Very good
___ Good
___ Fair
___ Poor
___ Very poor

**30. How well do you feel you can calm yourself down?***Please check the box that best describes your situation*
___ Very good
___ Good
___ Fair
___ Poor
___ Very poor

**31. How do you calm yourself when worried or upset?***Please check the box that best describes your situation*
___ Talk to someone
___ Think about how to change the situation
___ Exercise or walk
___ Cry or grieve
___ Read
___ Listen to music
___ Other – what: __________________

**Music and singing**

**32. Was music or singing part of your childhood home?**
*Please check the box that best describes your situation*___ Yes
___ No

**33. Have you sung, or do you sing, in a choir?***Please check the box that best describes your situation*
___ No
___ Yes – How many years? ________

**34. Do you sometimes sing by yourself or along with music on the radio or elsewhere?***Please check the box that best describes your situation*
___ Yes
___ No

**35. Do you sing for or with your child/children?**
*Please check the box that best describes your situation*
___ Yes
___ No

**36. Do you plan to sing for your child?**
*Please check the box that best describes your situation*
___ No
___ Yes – Which songs do you plan to sing? __________________

**37. How often do you expect to sing for your child?**
*Please check the box that best describes your situation*
___ Every day
___ Every week
___ Occasionally
___ On special occasions, e.g., birthdays and Christmas

**38. Do you use music in everyday life for one or more of the following purposes?**
*Please check the box(es) that best describes your situation*
___ To relax
___ To get more energy (e.g., while exercising)
___ In church or congregations
___ To get in the right mood
___ To express emotions
___ For reflection/self-understanding
___ For concentration
___ I don’t use music for any particular purpose

**Information about Family History**

**39. Have you experienced events that felt overwhelming (traumatic)?**
___ No
___ Yes – mark what applies:
___ Loss of a loved one
___ Divorce
___ Difficult childhood
___ Violence
___ Physical or psychological abuse
___ Childbirth
___ Other – what: __________________
___ Prefer not to say

**40. Are there cases of substance abuse, depression, suicide attempts, or self-harm in your family?**
___ No
___ Yes – what: __________________

**Information about Mental Illness**

***Examples of mental illness are depression, anxiety, stress, bipolar disorder, borderline disorder, etc.***

**41. Mental illness lasting less than 6 months**.
*Please check the box that best describes your situation*
___ No, I have never had a mental illness
___ Yes, I currently have a mental illness – Which: __________________
___ Yes, I have had a mental illness previously – Which: __________________
**If you have had one previously, do you still experience effects?**
___ No
___ Yes – Which: __________________

**42. Mental illness lasting more than 6 months.**
*Please check the box that best describes your situation*
___ No, I have never had a mental illness
___ Yes, I currently have a mental illness – Which: __________________
___ Yes, I have had a mental illness previously – Which: __________________
**If you have had one previously, do you still experience effects?**___ No
___ Yes – Which: __________________

**43. Do you take medication for your mental illness?**
*Please check the box that best describes your situation*
___ No
___ Yes – Which: __________________

**Information about the Family**

**44. Do you live alone or with others?**
*Please check the box that best describes your situation*
___ I live alone – skip to question 47
___ I live with my spouse/partner
___ I live with my parents
___ Other – what: __________________

**45. Do you live with the father of the child?**
*Please check the box that best describes your situation*___ No – skip to question 47
___ Yes

46. Is your partner currently “on land” (not working away, e.g., at sea)?*Please check the box that best describes your situation*
___ Yes
___ No

**47. What are your housing conditions?**
*Please check the box that best describes your situation*
___ Own home
___ Rented home
___ Living in the same house as parents/family/others
___ Other – what: __________________

**48. What is your level of education?**
*Please check the box that best describes your situation*___ 7th–9th grade
___ 10th grade
___ High school/technical school
___ Other – what: __________________

**49. Completed vocational/occupational education: __________________**

**50. Are you employed?**
*Please check the box that best describes your situation*
___ Yes – What: __________________
___ No – Why: __________________

**51. How do you/you and your family support yourselves and your child/children?***Please check the box that best describes your situation*
___ **Salary**
___ **Student support**___ **Unemployment benefits**___ **Social assistance**
___ Other – what: __________________

**EPDS Screening**

**52. Result of EPDS screening**
_____ 0–9 score – go to question 54
_____ 10–12 score
_____ 13 or higher

**53. What do you think is the reason you’re not thriving right now?**

**54. Is there anything else you would like to add?**
___ No
___ Yes – what: __________________

**Thank you very much.**
